# Supplementary material for: Comparative Analysis of CDPK Family in Maize, Arabidopsis, Rice, and Sorghum Revealed Potential Targets for Drought Tolerance Improvement
Source: Front Chem. 2017 Dec 19;5:115. doi: 10.3389/fchem.2017.00115 (PMC5742180; doi:10.3389/fchem.2017.00115)
Supplement: Supplementary file 1 [file Table1.XLSX]

## Sheet: Supplementary Table S1
Supplementary Table S1: List of 273 CDPK genes identified in Arabidopsis, maize, rice and sorghum with their general characteristics.
Gene Name	Gene ID	Transcript Name	Peptide Name	Chr	Gene Start	Gene End	Protein length	Mol. Wt.	pI	GRAVY	Instability index
AtCDPK1	AT1G06390	AT1G06390.2	19654371_peptide	1	1946802	1950860	407	46024.2	8.63	-0.252	48.72
AtCDPK2	AT1G09840	AT1G09840.6	19653742_peptide	1	3195827	3199978	421	47668.7	8.58	-0.343	35.27
AtCDPK3	AT1G10210	AT1G10210.2	19651899_peptide	1	3349235	3351180	370	42644.4	6.5	-0.215	43.02
AtCDPK4	AT1G10940	AT1G10940.1	19654762_peptide	1	3655777	3658578	363	41168.8	5.4	-0.468	44.22
AtCDPK5	AT1G20930	AT1G20930.1	19658316_peptide	1	7292568	7294746	315	35846.8	8.82	-0.279	29.63
AtCDPK6	AT1G30270	AT1G30270.1	19654213_peptide	1	10654857	10658897	482	53514.3	9.25	-0.411	32.75
AtCDPK7	AT1G35670	AT1G35670.1	19654110_peptide	1	13205381	13208252	495	55916	5.26	-0.363	43.75
AtCDPK8	AT1G60940	AT1G60940.2	19650904_peptide	1	22439123	22442217	361	41039.8	5.62	-0.439	45.49
AtCDPK9	AT1G68830	AT1G68830.1	19655902_peptide	1	25872445	25875550	562	63252.2	9.37	-0.194	41.59
AtCDPK10	AT1G71830	AT1G71830.1	19652224_peptide	1	27018158	27022117	625	69022.1	5.32	-0.111	41.17
AtCDPK11	AT1G72710	AT1G72710.1	19657632_peptide	1	27372271	27376584	465	51878.9	9.59	-0.48	47.59
AtCDPK12	AT1G73670	AT1G73670.1	19655413_peptide	1	27700050	27703440	576	65251	8.67	-0.581	44.63
AtCDPK13	AT1G76540	AT1G76540.1	19649219_peptide	1	28720328	28722521	313	35593.4	8.54	-0.255	31.99
AtCDPK14	AT1G78290	AT1G78290.3	19654849_peptide	1	29457205	29459400	343	38249.7	5.38	-0.169	34.32
AtCDPK15	AT2G17290	AT2G17290.1	19640449_peptide	2	7516415	7519633	544	61111.5	5.41	-0.317	41.73
AtCDPK16	AT2G17890	AT2G17890.1	19642660_peptide	2	7769885	7772627	571	64753.9	9.36	-0.562	40.59
AtCDPK17	AT2G23070	AT2G23070.1	19639160_peptide	2	9823965	9826898	432	50236.4	9.48	-0.589	47.01
AtCDPK18	AT2G25760	AT2G25760.1	19642122_peptide	2	10984808	10988924	673	76181.7	9.08	-0.551	45.2
AtCDPK19	AT2G25880	AT2G25880.1	19643519_peptide	2	11034652	11036910	288	33310.3	9.1	-0.369	44.63
AtCDPK20	AT2G26980	AT2G26980.3	19642734_peptide	2	11514703	11518734	441	50599.9	6.79	-0.537	38.75
AtCDPK21	AT2G26980	AT2G26980.4	19642733_peptide	2	11514703	11518505	451	51823.5	7.64	-0.54	38.81
AtCDPK22	AT2G27030	AT2G27030.3	19643482_peptide	2	11532004	11534333	181	20576	4.7	-0.79	36.69
AtCDPK23	AT2G38620	AT2G38620.2	19642511_peptide	2	16152532	16154086	311	35582.2	8.26	-0.254	32.06
AtCDPK24	AT2G40120	AT2G40120.1	19642813_peptide	2	16754939	16757592	570	64915.4	4.51	-0.359	53.86
AtCDPK25	AT2G42880	AT2G42880.1	19639971_peptide	2	17840388	17844380	606	68774.9	9.37	-0.438	38.63
AtCDPK26	AT2G43790	AT2G43790.1	19638767_peptide	2	18138307	18140988	395	45057.5	5.28	-0.282	49.19
AtCDPK27	AT2G46700	AT2G46700.1	19638392_peptide	2	19182724	19186578	595	66600.1	8.96	-0.395	47.04
AtCDPK28	AT3G01090	AT3G01090.2	19662650_peptide	3	31181	34487	535	61181.6	8.44	-0.301	47.31
AtCDPK29	AT3G01090	AT3G01090.3	19662652_peptide	3	31187	34451	512	58373.4	8.01	-0.295	48.48
AtCDPK30	AT3G03940	AT3G03940.1	19663042_peptide	3	1014025	1019224	701	77994	9.07	-0.413	48.66
AtCDPK31	AT3G05840	AT3G05840.2	19663806_peptide	3	1740020	1743163	409	46587	8.55	-0.249	37.21
AtCDPK32	AT3G13670	AT3G13670.1	19662900_peptide	3	4469222	4473547	703	78639.6	9.28	-0.519	47.51
AtCDPK33	AT3G18040	AT3G18040.1	19662678_peptide	3	6174719	6178465	510	58394.6	8.54	-0.527	37.49
AtCDPK34	AT3G20410	AT3G20410.1	19663326_peptide	3	7116201	7119121	541	60362.6	5.83	-0.457	37.9
AtCDPK35	AT3G20860	AT3G20860.1	19664852_peptide	3	7306147	7308434	427	48411.9	8.96	-0.512	48.91
AtCDPK36	AT3G43810	AT3G43810.1	19659055_peptide	3	15664371	15666460	149	16847.7	4.11	-0.619	24.52
AtCDPK37	AT3G48750	AT3G48750.1	19660583_peptide	3	18071536	18074641	294	34030.3	6.42	-0.341	24.87
AtCDPK38	AT3G50000	AT3G50000.1	19659191_peptide	3	18534459	18536970	403	47232.6	8.46	-0.309	31.03
AtCDPK39	AT3G50360	AT3G50360.1	19663660_peptide	3	18674337	18675712	169	19408.8	4.91	-0.859	27.33
AtCDPK40	AT3G50530	AT3G50530.1	19658833_peptide	3	18753541	18756773	601	66991.4	8.9	-0.367	47.79
AtCDPK41	AT3G51850	AT3G51850.1	19661030_peptide	3	19232467	19235889	528	59375.9	6.24	-0.403	42.68
AtCDPK42	AT3G53570	AT3G53570.4	19664262_peptide	3	19861179	19864588	467	54198.3	9.14	-0.457	50.32
AtCDPK43	AT3G54180	AT3G54180.1	19664609_peptide	3	20059796	20061438	309	35318.1	8.67	-0.274	29.33
AtCDPK44	AT4G01370	AT4G01370.1	19648685_peptide	4	567095	569088	376	42851.8	5.74	-0.333	42.13
AtCDPK45	AT4G04720	AT4G04720.1	19646216_peptide	4	2394458	2397759	531	59894.5	6.21	-0.465	36.84
AtCDPK46	AT4G09570	AT4G09570.1	19647895_peptide	4	6049517	6052335	501	56416.4	5.22	-0.367	46.96
AtCDPK47	AT4G14350	AT4G14350.3	19647477_peptide	4	8256086	8260575	548	63084.4	8.42	-0.707	37.44
AtCDPK48	AT4G18710	AT4G18710.1	19647788_peptide	4	10296273	10299362	380	43098.9	8.43	-0.187	47.06
AtCDPK49	AT4G23650	AT4G23650.1	19647432_peptide	4	12324758	12327459	529	59336.3	5.95	-0.534	39.82
AtCDPK50	AT4G24740	AT4G24740.2	19645316_peptide	4	12754530	12757786	324	37931	9.1	-0.387	44.55
AtCDPK51	AT4G28880	AT4G28880.1	19648613_peptide	4	14251214	14254432	415	46891.2	9.43	-0.573	38.36
AtCDPK52	AT4G32830	AT4G32830.1	19643922_peptide	4	15842453	15844536	294	33972.1	8.99	-0.378	43.63
AtCDPK53	AT4G33080	AT4G33080.1	19645227_peptide	4	15959962	15964710	519	60431.1	5.52	-0.615	45.97
AtCDPK54	AT4G33950	AT4G33950.1	19644296_peptide	4	16272253	16274810	362	41047.6	4.92	-0.342	47.34
AtCDPK55	AT4G35310	AT4G35310.1	19645805_peptide	4	16801987	16804995	556	62127.3	5.15	-0.347	35.65
AtCDPK56	AT5G02800	AT5G02800.1	19667812_peptide	5	635228	637503	378	41671.7	9.15	-0.347	39.14
AtCDPK57	AT5G04870	AT5G04870.1	19670991_peptide	5	1416783	1420338	610	68253.7	5.34	-0.452	43.1
AtCDPK58	AT5G08160	AT5G08160.1	19667355_peptide	5	2625559	2628110	347	38636.4	6.67	-0.174	44.24
AtCDPK59	AT5G10270	AT5G10270.1	19668369_peptide	5	3221607	3224765	505	56729.2	9.29	-0.82	44.2
AtCDPK60	AT5G12180	AT5G12180.1	19669564_peptide	5	3937024	3939596	528	58484.4	5.7	-0.449	37.34
AtCDPK61	AT5G12480	AT5G12480.1	19668691_peptide	5	4047515	4050533	535	60309.7	5.86	-0.476	39.63
AtCDPK62	AT5G18610	AT5G18610.2	19670127_peptide	5	6192443	6195753	513	55930.9	9.15	-0.619	43.73
AtCDPK63	AT5G19010	AT5G19010.1	19669081_peptide	5	6344789	6348212	567	64912.2	8.96	-0.566	38.48
AtCDPK64	AT5G19360	AT5G19360.1	19670343_peptide	5	6521716	6523780	523	58174.1	5.63	-0.476	39.9
AtCDPK65	AT5G19450	AT5G19450.2	19668317_peptide	5	6558426	6562000	533	59940.5	5.96	-0.418	35.9
AtCDPK66	AT5G26110	AT5G26110.1	19666989_peptide	5	9117907	9119826	226	25132.1	9.17	-0.135	33.13
AtCDPK67	AT5G26751	AT5G26751.1	19665837_peptide	5	9399377	9402476	405	46035.4	8.7	-0.263	33.89
AtCDPK68	AT5G37780	AT5G37780.1	19668782_peptide	5	15004527	15006205	149	16861.7	4.14	-0.613	29.01
AtCDPK69	AT5G43320	AT5G43320.1	19665807_peptide	5	17385867	17389527	480	54440.8	9.93	-0.638	49.95
AtCDPK70	AT5G47750	AT5G47750.1	19667069_peptide	5	19339703	19342361	586	64556.7	8.96	-0.345	44.61
AtCDPK71	AT5G67380	AT5G67380.1	19668456_peptide	5	26880966	26883430	409	47639.9	8.06	-0.279	36.23
AtCDPK72	AT5G67380	AT5G67380.2	19668457_peptide	5	26880966	26883420	376	43896.4	6.19	-0.253	39.07
ZmCDPK1	GRMZM2G006404	GRMZM2G006404_T01	GRMZM2G006404_P01	1	54331915	54334616	355	40751.7	6.18	-0.406	38.56
ZmCDPK2	GRMZM2G025387	GRMZM2G025387_T01	GRMZM2G047486_P01	2	136808866	136813546	510	56560.4	5.38	-0.285	35.79
ZmCDPK3	GRMZM2G025387	GRMZM2G025387_T02	GRMZM2G047486_P02	2	136808901	136813546	510	56560.4	5.38	-0.285	35.79
ZmCDPK4	GRMZM2G025387	GRMZM2G025387_T03	GRMZM2G047486_P03	2	136808918	136813266	510	56560.4	5.38	-0.285	35.79
ZmCDPK5	GRMZM2G027351	GRMZM2G027351_T02	GRMZM2G047486_P04	2	136808741	136812978	533	59235.3	5.58	-0.352	38.46
ZmCDPK6	GRMZM2G028086	GRMZM2G028086_T02	GRMZM2G047486_P05	2	136808901	136812840	473	52531.9	5.2	-0.22	38.87
ZmCDPK7	GRMZM2G030673	GRMZM2G030673_T01	GRMZM2G314396_P01	2	14545463	14553791	547	60360.6	5.54	-0.268	39.25
ZmCDPK8	GRMZM2G035843	GRMZM2G035843_T01	GRMZM2G167276_P01	3	187319634	187321946	510	56155.1	5.82	-0.383	32.75
ZmCDPK9	GRMZM2G047479	GRMZM2G047479_T01	GRMZM2G035843_P01	4	204839686	204843859	508	56479.3	5.41	-0.307	35.84
ZmCDPK10	GRMZM2G047486	GRMZM2G047486_T01	GRMZM2G053868_P01	4	13593243	13600357	522	58471.8	8.79	-0.435	42.33
ZmCDPK11	GRMZM2G047486	GRMZM2G047486_T02	GRMZM2G053868_P02	4	13593244	13600357	520	58244.5	8.79	-0.438	43.55
ZmCDPK12	GRMZM2G047486	GRMZM2G047486_T03	GRMZM2G081310_P01	4	157020786	157026774	562	61898.5	5.58	-0.251	45.99
ZmCDPK13	GRMZM2G047486	GRMZM2G047486_T04	GRMZM2G027351_P02	5	4651794	4655287	412	45786.2	4.79	-0.157	37.64
ZmCDPK14	GRMZM2G047486	GRMZM2G047486_T05	GRMZM2G157068_P01	5	73245908	73253023	522	58471.8	8.79	-0.435	42.33
ZmCDPK15	GRMZM2G053868	GRMZM2G053868_T01	GRMZM2G157068_P02	5	73245908	73253021	520	58244.5	8.79	-0.438	43.55
ZmCDPK16	GRMZM2G053868	GRMZM2G053868_T02	GRMZM2G088361_P01	6	152657185	152661816	540	60217.7	6.32	-0.406	41.77
ZmCDPK17	GRMZM2G058305	GRMZM2G058305_T01	GRMZM2G028086_P02	7	158780725	158782827	334	37430.2	8.9	-0.325	36.3
ZmCDPK18	GRMZM2G058305	GRMZM2G058305_T02	GRMZM2G109843_P01	7	165941392	165946829	601	66131.8	9.05	-0.283	51.39
ZmCDPK19	GRMZM2G058305	GRMZM2G058305_T03	GRMZM2G109843_P02	7	165941392	165946982	416	47393.5	6.29	-0.144	43.53
ZmCDPK20	GRMZM2G081310	GRMZM2G081310_T01	GRMZM2G154489_P01	7	152988408	152989553	140	15974.9	4.56	-0.588	17.15
ZmCDPK21	GRMZM2G088361	GRMZM2G088361_T01	GRMZM2G025387_P01	8	144618028	144622780	530	59938.1	5.92	-0.539	44.33
ZmCDPK22	GRMZM2G109843	GRMZM2G109843_T01	GRMZM2G025387_P02	8	144618028	144622578	530	59938.1	5.92	-0.539	44.33
ZmCDPK23	GRMZM2G109843	GRMZM2G109843_T02	GRMZM2G025387_P03	8	144618028	144620510	373	41682.5	8.12	-0.379	46.64
ZmCDPK24	GRMZM2G154489	GRMZM2G154489_T01	GRMZM2G030673_P01	8	117423561	117428562	541	60493.1	6.22	-0.429	43.8
ZmCDPK25	GRMZM2G157068	GRMZM2G157068_T01	GRMZM2G047479_P01	8	152912796	152915491	355	40804.6	5.91	-0.437	40.32
ZmCDPK26	GRMZM2G157068	GRMZM2G157068_T02	GRMZM2G058305_P01	8	75119745	75123757	539	60731.9	6.44	-0.602	50.15
ZmCDPK27	GRMZM2G167276	GRMZM2G167276_T01	GRMZM2G058305_P02	8	75119745	75123757	539	60731.9	6.44	-0.602	50.15
ZmCDPK28	GRMZM2G311220	GRMZM2G311220_T01	GRMZM2G058305_P03	8	75120922	75123757	478	53595.9	7.35	-0.586	49.3
ZmCDPK29	GRMZM2G311220	GRMZM2G311220_T03	GRMZM2G311220_P01	8	169208531	169215492	536	60168.7	6.11	-0.395	40.47
ZmCDPK30	GRMZM2G314396	GRMZM2G314396_T01	GRMZM2G311220_P03	8	169210552	169215338	430	48344.7	7.21	-0.29	42.52
ZmCDPK31	GRMZM2G321239	GRMZM2G321239_T01	GRMZM2G340224_P01	8	119699671	119702660	613	67489.1	6.73	-0.364	41.8
ZmCDPK32	GRMZM2G340224	GRMZM2G340224_T01	GRMZM2G321239_P01	10	134942355	134946973	556	61239.5	5.62	-0.285	41.94
OsCDPK1	LOC_Os01g09580	LOC_Os01g09580.1	33119872_peptide	1	9195527	9198962	149	16831.7	4.11	-0.602	23.23
OsCDPK2	LOC_Os01g10150	LOC_Os01g10150.1	33126448_peptide	1	9887626	9889328	149	16831.7	4.11	-0.602	26.33
OsCDPK3	LOC_Os01g10840	LOC_Os01g10840.1	33126149_peptide	1	35619684	35625793	551	61105.7	6.13	-0.413	42.52
OsCDPK4	LOC_Os01g14860	LOC_Os01g14860.3	33119782_peptide	1	38981302	38984078	303	34602.1	8.27	-0.31	30.45
OsCDPK5	LOC_Os01g16240	LOC_Os01g16240.1	33123266_peptide	1	24839124	24843618	518	58739.7	6.05	-0.563	46.4
OsCDPK6	LOC_Os01g17190	LOC_Os01g17190.1	33119807_peptide	1	34325310	34328118	515	56950.7	5.56	-0.419	34.95
OsCDPK7	LOC_Os01g43410	LOC_Os01g43410.1	33120911_peptide	1	4909983	4914370	295	34551.1	9.39	-0.338	46.61
OsCDPK8	LOC_Os01g51200	LOC_Os01g51200.1	33123873_peptide	1	37710241	37715296	360	41978.8	6.06	-0.616	53.65
OsCDPK9	LOC_Os01g54100	LOC_Os01g54100.1	33122919_peptide	1	5774281	5778466	404	45239.3	8.25	-0.197	44.51
OsCDPK10	LOC_Os01g56580	LOC_Os01g56580.2	33120534_peptide	1	8329957	8334052	408	46081.6	8.91	-0.246	36.36
OsCDPK11	LOC_Os01g59360	LOC_Os01g59360.1	33123524_peptide	1	35923800	35929979	434	50411.2	8.93	-0.388	45.04
OsCDPK12	LOC_Os01g61590	LOC_Os01g61590.1	33122997_peptide	1	42229506	42232641	513	56826.1	9.19	-0.847	41.09
OsCDPK13	LOC_Os01g62080	LOC_Os01g62080.2	33126531_peptide	1	29431660	29436466	472	52907.8	9.65	-0.586	46.66
OsCDPK14	LOC_Os01g64970	LOC_Os01g64970.1	33125923_peptide	1	5328818	5335518	636	71048.6	9.23	-0.581	45.25
OsCDPK15	LOC_Os01g67160	LOC_Os01g67160.1	33124265_peptide	1	31111292	31115859	671	75334.5	8.74	-0.504	48.5
OsCDPK16	LOC_Os01g72790	LOC_Os01g72790.1	33121552_peptide	1	32615694	32622894	698	77362	9.15	-0.437	41.27
OsCDPK17	LOC_Os03g01850	LOC_Os03g01850.1	33136412_peptide	2	2642977	2646360	370	42469.4	6.7	-0.156	37.94
OsCDPK18	LOC_Os03g02680	LOC_Os03g02680.1	33137150_peptide	2	30135356	30138729	588	65088.1	8.06	-0.46	47.11
OsCDPK19	LOC_Os03g10940	LOC_Os03g10940.1	33136325_peptide	2	35775030	35777266	545	60260	5.35	-0.27	44.93
OsCDPK20	LOC_Os03g20370	LOC_Os03g20370.1	33134587_peptide	2	1207635	1211226	376	42294.2	6.09	-0.383	42.45
OsCDPK21	LOC_Os03g27280	LOC_Os03g27280.1	33139849_peptide	2	28086381	28092152	549	60387.8	5.53	-0.243	38.3
OsCDPK22	LOC_Os03g41460	LOC_Os03g41460.1	33135227_peptide	2	20746262	20751379	365	41803.4	5.72	-0.621	43.13
OsCDPK23	LOC_Os03g55389	LOC_Os03g55389.1	33137776_peptide	2	1387873	1394417	522	58575.8	8.34	-0.484	36.73
OsCDPK24	LOC_Os03g55490	LOC_Os03g55490.1	33137137_peptide	2	7718903	7723687	401	44815.9	8.59	-0.161	40.44
OsCDPK25	LOC_Os03g55600	LOC_Os03g55600.1	33127136_peptide	3	11522674	11524473	149	16831.7	4.11	-0.602	23.23
OsCDPK26	LOC_Os03g57940	LOC_Os03g57940.2	33131642_peptide	3	997661	1001243	332	37866.7	6.33	-0.177	36.64
OsCDPK27	LOC_Os03g62500	LOC_Os03g62500.1	33129029_peptide	3	23068745	23071303	362	40699.3	4.8	-0.281	40.36
OsCDPK28	LOC_Os04g35240	LOC_Os04g35240.1	33131580_peptide	3	31508811	31514460	186	21952.1	6.83	-0.548	40.88
OsCDPK29	LOC_Os04g38480	LOC_Os04g38480.1	33129646_peptide	3	510595	514786	410	46894.1	8.44	-0.386	49.79
OsCDPK30	LOC_Os04g49510	LOC_Os04g49510.1	33131337_peptide	3	15628100	15632465	342	38698.3	5.43	-0.208	27.49
OsCDPK31	LOC_Os05g04340	LOC_Os05g04340.1	33133533_peptide	3	31652694	31658253	371	41723.4	4.85	-0.303	44.33
OsCDPK32	LOC_Os05g05160	LOC_Os05g05160.1	33127208_peptide	3	5616047	5620727	332	39408.3	8.12	-0.495	31.54
OsCDPK33	LOC_Os05g11140	LOC_Os05g11140.1	33127581_peptide	3	31566050	31570477	408	47257.1	8.92	-0.501	49.84
OsCDPK34	LOC_Os05g11730	LOC_Os05g11730.1	33128426_peptide	3	35385782	35392062	424	48156.5	8.75	-0.329	45.84
OsCDPK35	LOC_Os05g32360	LOC_Os05g32360.1	33131282_peptide	3	32999502	33006898	707	78810.8	9.25	-0.485	40.07
OsCDPK36	LOC_Os05g39090	LOC_Os05g39090.1	33112648_peptide	4	29531223	29536492	551	60966.2	5.45	-0.338	43.3
OsCDPK37	LOC_Os05g41210	LOC_Os05g41210.1	33108297_peptide	4	21414496	21419956	359	41325	5.83	-0.567	45.89
OsCDPK38	LOC_Os05g41270	LOC_Os05g41270.1	33112075_peptide	4	22867268	22872511	628	69587.5	5.97	-0.212	41.27
OsCDPK39	LOC_Os05g45420	LOC_Os05g45420.1	33154666_peptide	5	24132441	24134899	149	16817.7	4.12	-0.598	24.52
OsCDPK40	LOC_Os05g47560	LOC_Os05g47560.1	33159975_peptide	5	22919309	22924421	547	60993.6	6.44	-0.42	44.27
OsCDPK41	LOC_Os05g50810	LOC_Os05g50810.1	33156904_peptide	5	24175473	24178191	522	57631.6	5.77	-0.382	39.25
OsCDPK42	LOC_Os06g06090	LOC_Os06g06090.1	33157415_peptide	5	29140430	29144552	565	63744.3	6.59	-0.64	57.69
OsCDPK43	LOC_Os06g31220	LOC_Os06g31220.1	33156257_peptide	5	2511542	2518105	542	61762.4	8.82	-0.495	42.61
OsCDPK44	LOC_Os06g35530	LOC_Os06g35530.1	33155804_peptide	5	26346997	26351611	505	57614.5	8.02	-0.318	43.76
OsCDPK45	LOC_Os06g48590	LOC_Os06g48590.1	33156426_peptide	5	27245246	27249448	559	62386.8	9.33	-0.185	48.16
OsCDPK46	LOC_Os06g49430	LOC_Os06g49430.1	33154801_peptide	5	1974026	1977874	411	46763	8.58	-0.284	39.33
OsCDPK47	LOC_Os07g02350	LOC_Os07g02350.1	33156335_peptide	5	6657481	6661493	402	45509.4	8	-0.282	49.68
OsCDPK48	LOC_Os07g05620	LOC_Os07g05620.1	33158551_peptide	5	18868481	18872235	519	57450.8	9.23	-0.866	42.16
OsCDPK49	LOC_Os07g07560	LOC_Os07g07560.1	33159187_peptide	5	6272686	6282566	635	71550.2	8.72	-0.445	39.75
OsCDPK50	LOC_Os07g22710	LOC_Os07g22710.1	33147297_peptide	6	29398207	29402539	369	42244.3	6.86	-0.141	32.57
OsCDPK51	LOC_Os07g33110	LOC_Os07g33110.2	33148819_peptide	6	18158734	18165296	109	11948	9.99	-0.044	37.54
OsCDPK52	LOC_Os07g42770	LOC_Os07g42770.1	33146546_peptide	6	2806543	2813004	398	44858.1	5.45	-0.278	37.34
OsCDPK53	LOC_Os07g42940	LOC_Os07g42940.1	33147793_peptide	6	29949829	29954874	580	65944.5	7.01	-0.548	46.27
OsCDPK54	LOC_Os07g48780	LOC_Os07g48780.1	33147428_peptide	6	20717740	20724744	403	45306.6	8.21	-0.174	46.1
OsCDPK55	LOC_Os07g49470	LOC_Os07g49470.1	33115018_peptide	7	29197727	29200392	149	16831.7	4.11	-0.602	23.23
OsCDPK56	LOC_Os08g06060	LOC_Os08g06060.1	33115386_peptide	7	29630560	29633467	390	42740	8.51	-0.269	36.68
OsCDPK57	LOC_Os08g07760	LOC_Os08g07760.1	33116745_peptide	7	19769005	19774504	533	59505.8	5.93	-0.438	41.23
OsCDPK58	LOC_Os08g07890	LOC_Os08g07890.1	33114284_peptide	7	25717760	25722215	339	38538.1	5.31	-0.248	32.18
OsCDPK59	LOC_Os08g38320	LOC_Os08g38320.2	33117352_peptide	7	799478	805187	333	39342.2	8.6	-0.534	30.3
OsCDPK60	LOC_Os08g40170	LOC_Os08g40170.1	33115109_peptide	7	25617164	25621827	453	51293.2	8.46	-0.134	40.17
OsCDPK61	LOC_Os09g08420	LOC_Os09g08420.1	33114003_peptide	7	12794960	12803568	512	57584.5	7.64	-0.453	33.72
OsCDPK62	LOC_Os09g30150	LOC_Os09g30150.2	33116585_peptide	7	2643540	2647873	450	50708.2	9.23	-0.408	38.92
OsCDPK63	LOC_Os10g28640	LOC_Os10g28640.1	33116945_peptide	7	3773300	3779797	699	77915.7	9.44	-0.525	47.81
OsCDPK64	LOC_Os10g38950	LOC_Os10g38950.1	33105939_peptide	8	24274676	24277516	594	65034.1	8.74	-0.429	46.38
OsCDPK65	LOC_Os10g41490	LOC_Os10g41490.1	33106490_peptide	8	3307520	3310590	394	44584.8	6.41	-0.353	43.06
OsCDPK66	LOC_Os11g03970	LOC_Os11g03970.2	33104710_peptide	8	25419884	25421827	326	36976.9	8.72	-0.306	33.35
OsCDPK67	LOC_Os11g07040	LOC_Os11g07040.1	33104825_peptide	8	4344171	4350502	624	68701.5	5.88	-0.167	41.39
OsCDPK68	LOC_Os11g17080	LOC_Os11g17080.1	33106805_peptide	8	4440181	4448191	1686	191413	6.91	-0.208	41.75
OsCDPK69	LOC_Os12g03810	LOC_Os12g03810.2	33140848_peptide	9	4382992	4386627	567	61832.4	8.21	-0.313	40.74
OsCDPK70	LOC_Os12g39630	LOC_Os12g39630.1	33143674_peptide	9	18340159	18343614	583	63813	7.18	-0.494	46.53
OsCDPK71	LOC_Os02g03060	LOC_Os02g03060.1	33098862_peptide	10	20756089	20760021	376	42772.6	5.96	-0.348	46.01
OsCDPK72	LOC_Os02g03410	LOC_Os02g03410.1	33099484_peptide	10	14925735	14929778	659	72798.5	8.94	-0.088	36.21
OsCDPK73	LOC_Os02g05480	LOC_Os02g05480.1	33099469_peptide	10	22294733	22297700	334	37871.2	5.67	-0.409	36.79
OsCDPK74	LOC_Os02g14130	LOC_Os02g14130.1	33164500_peptide	11	3495218	3499974	513	56672.4	5.22	-0.269	37.93
OsCDPK75	LOC_Os02g34600	LOC_Os02g34600.1	33163271_peptide	11	9471521	9479355	498	56966.9	8.43	-0.48	38.91
OsCDPK76	LOC_Os02g46090	LOC_Os02g46090.1	33163837_peptide	11	1603707	1609154	454	52055.9	7.14	-0.441	40.27
OsCDPK77	LOC_Os02g49310	LOC_Os02g49310.1	33151809_peptide	12	24458153	24462001	361	40628.3	4.81	-0.272	35.85
OsCDPK78	LOC_Os02g58520	LOC_Os02g58520.1	33150043_peptide	12	1554888	1560308	438	50337.8	7.64	-0.492	38.18
SbCDPK1	Sb01g001760	Sb01g001760.1	Sb01g001760.1	1	1533346	1539424	426	48408.7	8.7	-0.327	45.31
SbCDPK2	Sb01g007120	Sb01g007120.1	Sb01g007120.1	1	6040033	6047051	366	41401.1	4.81	-0.328	42.5
SbCDPK3	Sb01g007270	Sb01g007270.1	Sb01g007270.1	1	6227929	6235174	385	44279.1	8.95	-0.361	35.91
SbCDPK4	Sb01g009600	Sb01g009600.1	Sb01g009600.1	1	8373763	8377040	512	56611.1	9.32	-0.796	37.86
SbCDPK5	Sb01g014720	Sb01g014720.1	Sb01g014720.1	1	14035941	14038920	362	40829.4	4.81	-0.298	38.69
SbCDPK6	Sb01g028760	Sb01g028760.1	Sb01g028760.1	1	50183023	50186127	333	37828	5.54	-0.443	37.62
SbCDPK7	Sb01g030680	Sb01g030680.1	Sb01g030680.1	1	53254212	53258199	377	42632.6	6.07	-0.308	46.4
SbCDPK8	Sb01g037010	Sb01g037010.1	Sb01g037010.1	1	60542716	60546563	149	16831.7	4.11	-0.602	23.23
SbCDPK9	Sb01g049350	Sb01g049350.1	Sb01g049350.1	1	72358953	72362187	234	27313.7	7.12	-0.161	32.65
SbCDPK10	Sb02g001110	Sb02g001110.1	Sb02g001110.1	2	979157	985611	332	39156.9	8.6	-0.528	29.74
SbCDPK11	Sb02g003030	Sb02g003030.1	Sb02g003030.1	2	3191827	3195892	449	50702.3	9.16	-0.387	35.97
SbCDPK12	Sb02g004030	Sb02g004030.1	Sb02g004030.1	2	4510147	4515952	712	79232.7	9.37	-0.487	44.75
SbCDPK13	Sb02g004030	Sb02g004030.2	Sb02g004030.2	2	4510147	4515952	712	79232.7	9.37	-0.487	44.75
SbCDPK14	Sb02g023430	Sb02g023430.1	Sb02g023430.1	2	57030620	57040003	338	38211.6	5.9	-0.253	52.52
SbCDPK15	Sb02g027630	Sb02g027630.1	Sb02g027630.1	2	62915586	62919496	577	63264.6	8.12	-0.518	44.93
SbCDPK16	Sb02g027630	Sb02g027630.2	Sb02g027630.2	2	62915586	62919496	577	63264.6	8.12	-0.518	44.93
SbCDPK17	Sb02g034640	Sb02g034640.1	Sb02g034640.1	2	69150066	69154180	531	59522	5.93	-0.416	40.97
SbCDPK18	Sb02g034640	Sb02g034640.2	Sb02g034640.2	2	69150066	69154180	436	48459.7	8.45	-0.332	45.77
SbCDPK19	Sb02g039410	Sb02g039410.2	Sb02g039410.2	2	73509145	73511701	172	19533	4.99	-0.663	37.4
SbCDPK20	Sb02g039640	Sb02g039640.1	Sb02g039640.1	2	73700217	73705170	339	38505.4	5.47	-0.191	31.86
SbCDPK21	Sb02g043510	Sb02g043510.1	Sb02g043510.1	2	77315782	77319922	414	46226.1	4.54	-0.416	31.47
SbCDPK22	Sb02g044090	Sb02g044090.1	Sb02g044090.1	2	77911498	77914576	404	44359.6	8.65	-0.342	30.15
SbCDPK23	Sb03g002380	Sb03g002380.1	Sb03g002380.1	3	2144906	2149147	404	45249.3	8.26	-0.21	45.88
SbCDPK24	Sb03g002790	Sb03g002790.1	Sb03g002790.1	3	2673180	2680938	609	68515.7	8.98	-0.481	39.03
SbCDPK25	Sb03g003130	Sb03g003130.1	Sb03g003130.1	3	3229111	3233250	287	33407.6	9.38	-0.397	45.32
SbCDPK26	Sb03g009580	Sb03g009580.1	Sb03g009580.1	3	10333816	10338112	408	45980.4	8.91	-0.222	34.61
SbCDPK27	Sb03g012070	Sb03g012070.1	Sb03g012070.1	3	13874594	13879147	405	45960.1	8.65	-0.222	39.16
SbCDPK28	Sb03g012070	Sb03g012070.2	Sb03g012070.2	3	13874594	13879147	398	45146.3	8.65	-0.197	39.94
SbCDPK29	Sb03g028340	Sb03g028340.1	Sb03g028340.1	3	56124118	56128760	525	59310.3	5.95	-0.53	43.24
SbCDPK30	Sb03g028740	Sb03g028740.3	Sb03g028740.3	3	56775084	56782423	533	61551.4	9.22	-0.603	39.23
SbCDPK31	Sb03g029340	Sb03g029340.1	Sb03g029340.1	3	57485238	57490269	428	49036.2	8.41	-0.405	32.31
SbCDPK32	Sb03g032560	Sb03g032560.1	Sb03g032560.1	3	60991486	60996729	470	52802.7	9.71	-0.595	49.52
SbCDPK33	Sb03g033530	Sb03g033530.1	Sb03g033530.1	3	61807928	61813555	499	57156.1	8.77	-0.327	44.74
SbCDPK34	Sb03g036000	Sb03g036000.1	Sb03g036000.1	3	64002937	64011190	693	76941.5	9.17	-0.459	41.3
SbCDPK35	Sb03g036000	Sb03g036000.2	Sb03g036000.2	3	64002937	64011190	669	74688.9	9.19	-0.473	42.08
SbCDPK36	Sb03g037570	Sb03g037570.1	Sb03g037570.1	3	65485324	65487344	462	51930.2	5.5	-0.388	32.52
SbCDPK37	Sb03g037630	Sb03g037630.1	Sb03g037630.1	3	65528969	65531465	184	20496.9	4.63	-0.721	47.3
SbCDPK38	Sb03g038870	Sb03g038870.1	Sb03g038870.1	3	66661067	66670497	545	60728.2	6.16	-0.401	41.67
SbCDPK39	Sb03g038890	Sb03g038890.1	Sb03g038890.1	3	66694428	66699391	721	81045.4	4.58	-0.421	45.28
SbCDPK40	Sb03g039230	Sb03g039230.1	Sb03g039230.1	3	66954297	66958899	434	50352.2	9	-0.372	44
SbCDPK41	Sb03g039230	Sb03g039230.2	Sb03g039230.2	3	66954297	66958899	434	50352.2	9	-0.372	44
SbCDPK42	Sb04g001920	Sb04g001920.1	Sb04g001920.1	4	1652207	1657019	293	33879.1	7.21	-0.331	32.12
SbCDPK43	Sb04g002220	Sb04g002220.1	Sb04g002220.1	4	2023811	2030267	525	58789.1	8.68	-0.403	43.22
SbCDPK44	Sb04g002220	Sb04g002220.2	Sb04g002220.2	4	2023811	2030267	523	58561.9	8.68	-0.406	44.44
SbCDPK45	Sb04g003480	Sb04g003480.1	Sb04g003480.1	4	3325168	3329588	370	42426.4	6.7	-0.135	37.93
SbCDPK46	Sb04g008580	Sb04g008580.1	Sb04g008580.1	4	9959616	9964286	417	46221.5	8.59	-0.146	40.83
SbCDPK47	Sb04g010990	Sb04g010990.1	Sb04g010990.1	4	15713948	15758647	420	47575.1	9.42	-0.526	35.98
SbCDPK48	Sb04g022410	Sb04g022410.1	Sb04g022410.1	4	51904908	51909936	364	41780.4	5.51	-0.561	42.86
SbCDPK49	Sb04g023810	Sb04g023810.1	Sb04g023810.1	4	53497402	53503290	626	68551.3	5.57	-0.154	42.65
SbCDPK50	Sb04g024880	Sb04g024880.3	Sb04g024880.3	4	54782410	54785727	338	39313.4	8.46	-0.334	53.58
SbCDPK51	Sb04g026150	Sb04g026150.1	Sb04g026150.1	4	55926093	55929967	292	33785	9.37	-0.392	47.02
SbCDPK52	Sb04g029460	Sb04g029460.1	Sb04g029460.1	4	59539664	59541541	572	62930.7	8.24	-0.399	43.83
SbCDPK53	Sb04g031570	Sb04g031570.1	Sb04g031570.1	4	61527139	61532455	490	54508.2	5.58	-0.251	47.3
SbCDPK54	Sb04g036670	Sb04g036670.1	Sb04g036670.1	4	66485075	66492094	735	81980.7	5.96	-0.175	47.6
SbCDPK55	Sb05g002000	Sb05g002000.1	Sb05g002000.1	5	2200614	2206124	440	50390	7.65	-0.448	35.82
SbCDPK56	Sb05g002000	Sb05g002000.2	Sb05g002000.2	5	2200614	2206124	440	50390	7.65	-0.448	35.82
SbCDPK57	Sb05g002000	Sb05g002000.3	Sb05g002000.3	5	2200614	2206124	440	50390	7.65	-0.448	35.82
SbCDPK58	Sb05g004610	Sb05g004610.1	Sb05g004610.1	5	5837360	5841218	515	57099.1	5.38	-0.304	36.71
SbCDPK59	Sb05g010000	Sb05g010000.1	Sb05g010000.1	5	20127500	20139007	410	47510.7	8.08	-0.414	37.94
SbCDPK60	Sb05g010000	Sb05g010000.2	Sb05g010000.2	5	20127500	20139007	410	47510.7	8.08	-0.414	37.94
SbCDPK61	Sb06g016960	Sb06g016960.1	Sb06g016960.1	6	46076491	46082274	377	43176.5	6.19	-0.426	42.89
SbCDPK62	Sb06g016960	Sb06g016960.2	Sb06g016960.2	6	46076491	46082274	313	35518.3	5.47	-0.443	47.49
SbCDPK63	Sb06g018760	Sb06g018760.1	Sb06g018760.1	6	48335682	48340839	622	68593.2	5.66	-0.24	40.23
SbCDPK64	Sb06g026530	Sb06g026530.1	Sb06g026530.1	6	55593138	55597448	555	61166.3	5.43	-0.288	39.81
SbCDPK65	Sb07g003810	Sb07g003810.1	Sb07g003810.1	7	4671118	4674850	388	44044.4	6.25	-0.298	36.47
SbCDPK66	Sb07g004750	Sb07g004750.1	Sb07g004750.1	7	6290776	6296000	530	57825	7.67	-0.135	42.97
SbCDPK67	Sb07g027490	Sb07g027490.1	Sb07g027490.1	7	62520210	62522099	325	36907	9.15	-0.333	30.52
SbCDPK68	Sb07g028750	Sb07g028750.1	Sb07g028750.1	7	63776848	63780686	603	65921.8	8.06	-0.485	46.58
SbCDPK69	Sb08g002240	Sb08g002240.1	Sb08g002240.1	8	2351803	2355253	308	34863.4	6.8	-0.183	33
SbCDPK70	Sb08g004510	Sb08g004510.1	Sb08g004510.1	8	5413386	5417550	515	56727.6	5.41	-0.286	37.4
SbCDPK71	Sb08g019700	Sb08g019700.1	Sb08g019700.1	8	50692257	50694459	364	40541.1	4.78	-0.236	36.98
SbCDPK72	Sb08g020960	Sb08g020960.1	Sb08g020960.1	8	52420574	52426898	575	65413.2	6.26	-0.703	49.04
SbCDPK73	Sb08g020960	Sb08g020960.2	Sb08g020960.2	8	52420574	52426898	575	65413.2	6.26	-0.703	49.04
SbCDPK74	Sb08g023280	Sb08g023280.1	Sb08g023280.1	8	55395469	55400699	599	66801.6	9	-0.46	43.82
SbCDPK75	Sb08g023280	Sb08g023280.2	Sb08g023280.2	8	55395469	55400699	599	66801.6	9	-0.46	43.82
SbCDPK76	Sb09g002710	Sb09g002710.1	Sb09g002710.1	9	2930634	2934428	412	46633.9	8.8	-0.251	38.81
SbCDPK77	Sb09g005720	Sb09g005720.1	Sb09g005720.1	9	7620684	7625880	376	43436.8	5.55	-0.521	46.21
SbCDPK78	Sb09g006270	Sb09g006270.1	Sb09g006270.1	9	9418128	9426964	607	68319.7	8.78	-0.425	42.94
SbCDPK79	Sb09g021410	Sb09g021410.1	Sb09g021410.1	9	50856476	50861400	359	41553.2	5.76	-0.49	51.8
SbCDPK80	Sb09g021730	Sb09g021730.1	Sb09g021730.1	9	51207854	51213047	766	83010.7	5.9	-0.635	63.23
SbCDPK81	Sb09g022960	Sb09g022960.1	Sb09g022960.1	9	52586040	52590913	543	60461	6.32	-0.412	41.93
SbCDPK82	Sb09g024040	Sb09g024040.1	Sb09g024040.1	9	53623563	53626358	149	16831.7	4.11	-0.602	23.23
SbCDPK83	Sb09g024100	Sb09g024100.1	Sb09g024100.1	9	53675914	53677907	527	58062	5.61	-0.383	36.06
SbCDPK84	Sb09g026450	Sb09g026450.1	Sb09g026450.1	9	55719238	55723125	504	57615.7	8.43	-0.25	44.59
SbCDPK85	Sb09g027380	Sb09g027380.1	Sb09g027380.1	9	56449825	56457574	562	62876.4	9.37	-0.185	45.5
SbCDPK86	Sb09g029950	Sb09g029950.1	Sb09g029950.1	9	58613330	58617248	541	61089.3	6.44	-0.605	51.26
SbCDPK87	Sb10g003810	Sb10g003810.1	Sb10g003810.1	10	3303588	3309075	402	45501.8	5.32	-0.345	42.2
SbCDPK88	Sb10g026160	Sb10g026160.1	Sb10g026160.1	10	55514305	55516212	325	36742	9.28	-0.278	31.56
SbCDPK89	Sb10g028780	Sb10g028780.1	Sb10g028780.1	10	58634496	58638900	369	42395.5	6.86	-0.167	32.69
SbCDPK90	Sb10g030040	Sb10g030040.1	Sb10g030040.1	10	59772008	59778271	552	61473.3	8.63	-0.269	44.03
SbCDPK91	Sb1599s002010	Sb1599s002010.1	Sb1599s002010.1	GL004187.1	1841	2517	113	12896.3	4.19	-0.686	28.85
