# Supplementary material for: Comparative Analysis of CDPK Family in Maize, Arabidopsis, Rice, and Sorghum Revealed Potential Targets for Drought Tolerance Improvement
Source: Front Chem. 2017 Dec 19;5:115. doi: 10.3389/fchem.2017.00115 (PMC5742180; doi:10.3389/fchem.2017.00115)
Supplement: Supplementary file 3 [file Table3.XLSX]

## Sheet: Sheet1
Supplementary Table S3: Predicted N-term, myristoylation, and palmitoylation site for all 273 proteins beloning to Arabidopsis, maize, rice and sorghum
Protein ID	N-term	N-Myr	N-Pal
AT1G06390.2	MASLP	negative	Positive
AT1G09840.6	MASSG	negative	Positive
AT1G10210.2	MATLV	negative	Positive
AT1G10940.1	-	negative	Positive
AT1G20930.1	-	negative	Positive
AT1G30270.1	MASRT	negative	Positive
AT1G35670.1	METKPN	negative	Positive
AT1G60940.2	-	negative	Positive
AT1G68830.1	MATIS	negative	Positive
AT1G71830.1	MESSYV	negative	Positive
AT1G72710.1	-	negative	Positive
AT1G73670.1	MGGGG	negative	Positive
AT1G76540.1	-	negative	Positive
AT1G78290.3	-	negative	Positive
AT2G17290.1	MGNSC	positive	Positive
AT2G17890.1	MGLCF	positive	Positive
AT2G23070.1	MALRP	negative	Positive
AT2G25760.1	-	negative	Positive
AT2G25880.1	MGIST	negative	Positive
AT2G26980.3	-	negative	Positive
AT2G26980.4	-	negative	Positive
AT2G27030.3	MADQL	negative	Positive
AT2G38620.2	-	negative	Positive
AT2G40120.1	MAVDV	negative	Positive
AT2G42880.1	-	negative	Positive
AT2G43790.1	MDGGSG	negative	Positive
AT2G46700.1	MGQCY	positive	Positive
AT3G01090.2	-	negative	Positive
AT3G01090.3	MDGSGT	negative	Positive
AT3G03940.1	-	negative	Positive
AT3G05840.2	MASVG	negative	Positive
AT3G13670.1	-	negative	Positive
AT3G18040.1	-	negative	Positive
AT3G20410.1	MGNCF	positive	Positive
AT3G20860.1	MANKI	negative	Positive
AT3G43810.1	MADQL	negative	Positive
AT3G48750.1	-	negative	Positive
AT3G50000.1	-	negative	Positive
AT3G50360.1	MSSIY	negative	Positive
AT3G50530.1	MGLCT	positive	Positive
AT3G51850.1	MGNCC	positive	Positive
AT3G53570.4	MQSSVY	negative	Positive
AT3G54180.1	-	negative	Positive
AT4G01370.1	MSAES	negative	Positive
AT4G04720.1	MGCFS	positive	Positive
AT4G09570.1	-	negative	Positive
AT4G14350.3	METAKA	negative	Positive
AT4G18710.1	MADDK	negative	Positive
AT4G23650.1	MGHRH	positive	Positive
AT4G24740.2	MGEGT	negative	Positive
AT4G28880.1	-	negative	Positive
AT4G32830.1	MAIPT	negative	Positive
AT4G33080.1	-	negative	Positive
AT4G33950.1	-	negative	Positive
AT4G35310.1	MGNSC	positive	Positive
AT5G02800.1	MGWIP	negative	Positive
AT5G04870.1	MGNTC	positive	Positive
AT5G08160.1	MGCSF	positive	Positive
AT5G10270.1	MAMAS	negative	Positive
AT5G12180.1	MGNCC	positive	Positive
AT5G12480.1	MGNCC	positive	Positive
AT5G18610.2	MSGCL	negative	Positive
AT5G19010.1	-	negative	Positive
AT5G19360.1	MGNCC	positive	Positive
AT5G19450.2	MGNCC	positive	Positive
AT5G26110.1	-	negative	Positive
AT5G26751.1	MASVG	negative	Positive
AT5G37780.1	MADQL	negative	Positive
AT5G43320.1	-	negative	Positive
AT5G47750.1	MASTR	negative	Positive
AT5G67380.1	-	negative	Positive
AT5G67380.2	-	negative	Positive
GRMZM2G006404_P01	-	negative	Positive
GRMZM2G025387_P01	MGNRA	positive	Positive
GRMZM2G025387_P02	MGNRA	positive	Positive
GRMZM2G025387_P03	MGNRA	positive	Positive
GRMZM2G027351_P02	-	negative	Positive
GRMZM2G028086_P02	MGNCC	positive	Positive
GRMZM2G030673_P01	MGNCC	positive	Positive
GRMZM2G035843_P01	-	negative	Positive
GRMZM2G047479_P01	-	negative	Positive
GRMZM2G047486_P01	-	negative	Positive
GRMZM2G047486_P02	-	negative	Positive
GRMZM2G047486_P03	-	negative	Positive
GRMZM2G047486_P04	MSESP	negative	Positive
GRMZM2G047486_P05	-	negative	Positive
GRMZM2G053868_P01	MGACF	positive	Positive
GRMZM2G053868_P02	MGACF	positive	Positive
GRMZM2G058305_P01	MGGRA	positive	Positive
GRMZM2G058305_P02	MGGRA	positive	Positive
GRMZM2G058305_P03	MGGRAS	positive	Positive
GRMZM2G081310_P01	MGNTC	positive	Positive
GRMZM2G088361_P01	MGNCC	positive	Positive
GRMZM2G109843_P01	MGGCHA	positive	Positive
GRMZM2G109843_P02	MTTSIA	negative	Positive
GRMZM2G154489_P01	-	negative	Positive
GRMZM2G157068_P01	MGACFS	positive	Positive
GRMZM2G157068_P02	MGACFS	positive	Positive
GRMZM2G167276_P01	MGNCC	positive	Positive
GRMZM2G311220_P01	MGNCC	positive	Positive
GRMZM2G311220_P03	MGNCC	positive	Positive
GRMZM2G314396_P01	MGNAC	positive	Positive
GRMZM2G321239_P01	MGNAC	positive	Positive
GRMZM2G340224_P01	-	positive	Positive
LOC_Os01g09580.1	-	negative	Positive
LOC_Os01g10150.1	MPARRG	negative	Positive
LOC_Os01g10840.1	MEAPPG	negative	Positive
LOC_Os01g14860.3	MGSVGV	negative	Positive
LOC_Os01g16240.1	MADQL	negative	Positive
LOC_Os01g17190.1	MADQL	negative	Positive
LOC_Os01g43410.1	MGNRT	positive	Positive
LOC_Os01g51200.1	-	negative	Positive
LOC_Os01g54100.1	-	negative	Positive
LOC_Os01g56580.2	-	negative	Positive
LOC_Os01g59360.1	MGNCC	positive	Positive
LOC_Os01g61590.1	MGNCC	positive	Positive
LOC_Os01g62080.2	MEAQWL	negative	Positive
LOC_Os01g64970.1	-	negative	Positive
LOC_Os01g67160.1	-	negative	Positive
LOC_Os01g72790.1	MAVAA	negative	Positive
LOC_Os02g03060.1	-	negative	Positive
LOC_Os02g03410.1	MGACFS	positive	Positive
LOC_Os02g05480.1	MAIMV	negative	Positive
LOC_Os02g14130.1	MATLPG	negative	Positive
LOC_Os02g34600.1	-	negative	Positive
LOC_Os02g46090.1	MGNTC	positive	Positive
LOC_Os02g49310.1	MATTAS	negative	Positive
LOC_Os02g58520.1	MGNYY	positive	Positive
LOC_Os03g01850.1	MAPRP	negative	Positive
LOC_Os03g02680.1	-	negative	Positive
LOC_Os03g10940.1	MSTARV	negative	Positive
LOC_Os03g20370.1	MADQL	negative	Positive
LOC_Os03g27280.1	-	negative	Positive
LOC_Os03g41460.1	-	negative	Positive
LOC_Os03g55389.1	-	negative	Positive
LOC_Os03g55490.1	MAWCA	negative	Positive
LOC_Os03g55600.1	MAAAGA	negative	Positive
LOC_Os03g57940.2	-	negative	Positive
LOC_Os03g62500.1	MAYSG	negative	Positive
LOC_Os04g35240.1	-	negative	Positive
LOC_Os04g38480.1	MAEAR	negative	Positive
LOC_Os04g49510.1	MGNAC	positive	Positive
LOC_Os05g04340.1	MASVGV	negative	Positive
LOC_Os05g05160.1	-	negative	Positive
LOC_Os05g11140.1	-	negative	Positive
LOC_Os05g11730.1	-	negative	Positive
LOC_Os05g32360.1	MAVAA	negative	Positive
LOC_Os05g39090.1	MGNCC	positive	Positive
LOC_Os05g41210.1	MADQL	negative	Positive
LOC_Os05g41270.1	MGNCC	positive	Positive
LOC_Os05g45420.1	MEGAGR	negative	Positive
LOC_Os05g47560.1	MATGSL	negative	Positive
LOC_Os05g50810.1	MVSSSS	positive	Positive
LOC_Os06g06090.1	MDAGAQ	negative	Positive
LOC_Os06g31220.1	MALRV	negative	Positive
LOC_Os06g35530.1	MAAMPG	negative	Positive
LOC_Os06g48590.1	MAMMV	negative	Positive
LOC_Os06g49430.1	MGGGGT	negative	Positive
LOC_Os07g02350.1	MSKAR	negative	Positive
LOC_Os07g05620.1	MSVSG	negative	Positive
LOC_Os07g07560.1	-	negative	Positive
LOC_Os07g22710.1	MGLCS	positive	Positive
LOC_Os07g33110.2	MGSCCS	positive	Positive
LOC_Os07g42770.1	MGDEV	negative	Positive
LOC_Os07g42940.1	-	negative	Positive
LOC_Os07g48780.1	MADQL	negative	Positive
LOC_Os07g49470.1	MACCF	negative	Positive
LOC_Os08g06060.1	-	negative	Positive
LOC_Os08g07760.1	MAAHRW	negative	Positive
LOC_Os08g07890.1	MAMML	negative	Positive
LOC_Os08g38320.2	MSVEA	negative	Positive
LOC_Os08g40170.1	MAALH	negative	Positive
LOC_Os09g08420.1	MASKAV	negative	Positive
LOC_Os09g30150.2	MSSKSP	negative	Positive
LOC_Os10g28640.1	MMATLA	negative	Positive
LOC_Os10g38950.1	MDSSSG	negative	Positive
LOC_Os10g41490.1	-	negative	Positive
LOC_Os11g03970.2	MSTTKV	negative	Positive
LOC_Os11g07040.1	-	negative	Positive
LOC_Os11g17080.1	-	negative	Positive
LOC_Os12g03810.2	MSTTKV	negative	Positive
LOC_Os12g39630.1	-	negative	Positive
Sb01g001760.1	MAYSG	negative	Positive
Sb01g007120.1	MAGPAP	negative	Positive
Sb01g007270.1	MIGAPP	negative	Positive
Sb01g009600.1	MAVAA	negative	Positive
Sb01g014720.1	-	negative	Positive
Sb01g028760.1	-	negative	Positive
Sb01g030680.1	MDSSGG	negative	Positive
Sb01g037010.1	MADQL	negative	Positive
Sb01g049350.1	-	negative	Positive
Sb02g001110.1	MSKAR	negative	Positive
Sb02g003030.1	MSASVG	negative	Positive
Sb02g004030.1	-	negative	Positive
Sb02g004030.2	-	negative	Positive
Sb02g023430.1	MGCSM	negative	Positive
Sb02g027630.1	MAGQTA	negative	Positive
Sb02g027630.2	MAGQTA	negative	Positive
Sb02g034640.1	MGQCC	positive	Positive
Sb02g034640.2	MGQCC	positive	Positive
Sb02g039410.2	MSFNQ	negative	Positive
Sb02g039640.1	-	negative	Positive
Sb02g043510.1	MADQL	negative	Positive
Sb02g044090.1	-	negative	Positive
Sb03g002380.1	MEAPPG	negative	Positive
Sb03g002790.1	-	negative	Positive
Sb03g003130.1	MAIAS	negative	Positive
Sb03g009580.1	MASAGV	negative	Positive
Sb03g012070.1	MTSVGL	negative	Positive
Sb03g012070.2	MTSVGL	negative	Positive
Sb03g028340.1	MGNRA	positive	Positive
Sb03g028740.3	-	negative	Positive
Sb03g029340.1	-	negative	Positive
Sb03g032560.1	-	negative	Positive
Sb03g033530.1	MEGTGK	negative	Positive
Sb03g036000.1	-	negative	Positive
Sb03g036000.2	-	negative	Positive
Sb03g037570.1	-	negative	Positive
Sb03g037630.1	MADQL	negative	Positive
Sb03g038870.1	MGNCC	positive	Positive
Sb03g038890.1	MAAQGL	negative	Positive
Sb03g039230.1	MEAQWL	negative	Positive
Sb03g039230.2	MEAQWL	negative	Positive
Sb04g001920.1	-	negative	Positive
Sb04g002220.1	MGACFS	positive	Positive
Sb04g002220.2	MGACFS	positive	Positive
Sb04g003480.1	MAMMV	negative	Positive
Sb04g008580.1	MAAPPG	negative	Positive
Sb04g010990.1	-	negative	Positive
Sb04g022410.1	-	negative	Positive
Sb04g023810.1	MAAAAA	negative	Positive
Sb04g024880.3	-	negative	Positive
Sb04g026150.1	MAIAT	negative	Positive
Sb04g029460.1	MASKAM	negative	Positive
Sb04g031570.1	-	negative	Positive
Sb04g036670.1	-	negative	Positive
Sb05g002000.1	MSTTKV	negative	Positive
Sb05g002000.2	MSTTKV	negative	Positive
Sb05g002000.3	MSTTKV	negative	Positive
Sb05g004610.1	-	negative	Positive
Sb05g010000.1	-	negative	Positive
Sb05g010000.2	-	negative	Positive
Sb06g016960.1	-	negative	Positive
Sb06g016960.2	-	negative	Positive
Sb06g018760.1	MAASLR	negative	Positive
Sb06g026530.1	MGNAC	positive	Positive
Sb07g003810.1	-	negative	Positive
Sb07g004750.1	MAAAEA	negative	Positive
Sb07g027490.1	MATMQH	negative	Positive
Sb07g028750.1	MSVEA	negative	Positive
Sb08g002240.1	-	negative	Positive
Sb08g004510.1	-	negative	Positive
Sb08g019700.1	MARTP	negative	Positive
Sb08g020960.1	MDSARS	negative	Positive
Sb08g020960.2	MDSARS	negative	Positive
Sb08g023280.1	MADSG	negative	Positive
Sb08g023280.2	MADSG	negative	Positive
Sb09g002710.1	MASVGV	negative	Positive
Sb09g005720.1	MESEMA	negative	Positive
Sb09g006270.1	-	negative	Positive
Sb09g021410.1	-	negative	Positive
Sb09g021730.1	-	negative	Positive
Sb09g022960.1	MGNCC	positive	Positive
Sb09g024040.1	MADQL	negative	Positive
Sb09g024100.1	MGNCC	positive	Positive
Sb09g026450.1	-	negative	Positive
Sb09g027380.1	MAASG	negative	Positive
Sb09g029950.1	MGGRAS	positive	Positive
Sb10g003810.1	MDGGGQ	negative	Positive
Sb10g026160.1	MATIQH	negative	Positive
Sb10g028780.1	MAMMV	negative	Positive
Sb10g030040.1	MGQCY	positive	Positive
Sb1599s002010.1	MRSLGQ	negative	Positive

## Sheet: Sheet2
AT1G06390.2	negative
AT1G09840.6	negative
AT1G10210.2	negative
AT1G10940.1	negative
AT1G20930.1	negative
AT1G30270.1	negative
AT1G35670.1	negative
AT1G60940.2	negative
AT1G68830.1	negative
AT1G71830.1	negative
AT1G72710.1	negative
AT1G73670.1	negative
AT1G76540.1	negative
AT1G78290.3	negative
AT2G17290.1	positive
AT2G17890.1	positive
AT2G23070.1	negative
AT2G25760.1	negative
AT2G25880.1	negative
AT2G26980.3	negative
AT2G26980.4	negative
AT2G27030.3	negative
AT2G38620.2	negative
AT2G40120.1	negative
AT2G42880.1	negative
AT2G43790.1	negative
AT2G46700.1	positive
AT3G01090.2	negative
AT3G01090.3	negative
AT3G03940.1	negative
AT3G05840.2	negative
AT3G13670.1	negative
AT3G18040.1	negative
AT3G20410.1	positive
AT3G20860.1	negative
AT3G43810.1	negative
AT3G48750.1	negative
AT3G50000.1	negative
AT3G50360.1	negative
AT3G50530.1	positive
AT3G51850.1	positive
AT3G53570.4	negative
AT3G54180.1	negative
AT4G01370.1	negative
AT4G04720.1	positive
AT4G09570.1	negative
AT4G14350.3	negative
AT4G18710.1	negative
AT4G23650.1	positive
AT4G24740.2	negative
AT4G28880.1	negative
AT4G32830.1	negative
AT4G33080.1	negative
AT4G33950.1	negative
AT4G35310.1	positive
AT5G02800.1	negative
AT5G04870.1	positive
AT5G08160.1	positive
AT5G10270.1	negative
AT5G12180.1	positive
AT5G12480.1	positive
AT5G18610.2	negative
AT5G19010.1	negative
AT5G19360.1	positive
AT5G19450.2	positive
AT5G26110.1	negative
AT5G26751.1	negative
AT5G37780.1	negative
AT5G43320.1	negative
AT5G47750.1	negative
AT5G67380.1	negative
AT5G67380.2	negative
GRMZM2G006404_P01	negative
GRMZM2G025387_P01	positive
GRMZM2G025387_P02	positive
GRMZM2G025387_P03	positive
GRMZM2G027351_P02	negative
GRMZM2G028086_P02	positive
GRMZM2G030673_P01	positive
GRMZM2G035843_P01	negative
GRMZM2G047479_P01	negative
GRMZM2G047486_P01	negative
GRMZM2G047486_P02	negative
GRMZM2G047486_P03	negative
GRMZM2G047486_P04	negative
GRMZM2G047486_P05	negative
GRMZM2G053868_P01	positive
GRMZM2G053868_P02	positive
GRMZM2G058305_P01	positive
GRMZM2G058305_P02	positive
GRMZM2G058305_P03	positive
GRMZM2G081310_P01	positive
GRMZM2G088361_P01	positive
GRMZM2G109843_P01	positive
GRMZM2G109843_P02	negative
GRMZM2G154489_P01	negative
GRMZM2G157068_P01	positive
GRMZM2G157068_P02	positive
GRMZM2G167276_P01	positive
GRMZM2G311220_P01	positive
GRMZM2G311220_P03	positive
GRMZM2G314396_P01	positive
GRMZM2G321239_P01	positive
GRMZM2G340224_P01	positive
LOC_Os01g09580.1	negative
LOC_Os01g10150.1	negative
LOC_Os01g10840.1	negative
LOC_Os01g14860.3	negative
LOC_Os01g16240.1	negative
LOC_Os01g17190.1	negative
LOC_Os01g43410.1	positive
LOC_Os01g51200.1	negative
LOC_Os01g54100.1	negative
LOC_Os01g56580.2	negative
LOC_Os01g59360.1	positive
LOC_Os01g61590.1	positive
LOC_Os01g62080.2	negative
LOC_Os01g64970.1	negative
LOC_Os01g67160.1	negative
LOC_Os01g72790.1	negative
LOC_Os02g03060.1	negative
LOC_Os02g03410.1	positive
LOC_Os02g05480.1	negative
LOC_Os02g14130.1	negative
LOC_Os02g34600.1	negative
LOC_Os02g46090.1	positive
LOC_Os02g49310.1	negative
LOC_Os02g58520.1	positive
LOC_Os03g01850.1	negative
LOC_Os03g02680.1	negative
LOC_Os03g10940.1	negative
LOC_Os03g20370.1	negative
LOC_Os03g27280.1	negative
LOC_Os03g41460.1	negative
LOC_Os03g55389.1	negative
LOC_Os03g55490.1	negative
LOC_Os03g55600.1	negative
LOC_Os03g57940.2	negative
LOC_Os03g62500.1	negative
LOC_Os04g35240.1	negative
LOC_Os04g38480.1	negative
LOC_Os04g49510.1	positive
LOC_Os05g04340.1	negative
LOC_Os05g05160.1	negative
LOC_Os05g11140.1	negative
LOC_Os05g11730.1	negative
LOC_Os05g32360.1	negative
LOC_Os05g39090.1	positive
LOC_Os05g41210.1	negative
LOC_Os05g41270.1	positive
LOC_Os05g45420.1	negative
LOC_Os05g47560.1	negative
LOC_Os05g50810.1	positive
LOC_Os06g06090.1	negative
LOC_Os06g31220.1	negative
LOC_Os06g35530.1	negative
LOC_Os06g48590.1	negative
LOC_Os06g49430.1	negative
LOC_Os07g02350.1	negative
LOC_Os07g05620.1	negative
LOC_Os07g07560.1	negative
LOC_Os07g22710.1	positive
LOC_Os07g33110.2	positive
LOC_Os07g42770.1	negative
LOC_Os07g42940.1	negative
LOC_Os07g48780.1	negative
LOC_Os07g49470.1	negative
LOC_Os08g06060.1	negative
LOC_Os08g07760.1	negative
LOC_Os08g07890.1	negative
LOC_Os08g38320.2	negative
LOC_Os08g40170.1	negative
LOC_Os09g08420.1	negative
LOC_Os09g30150.2	negative
LOC_Os10g28640.1	negative
LOC_Os10g38950.1	negative
LOC_Os10g41490.1	negative
LOC_Os11g03970.2	negative
LOC_Os11g07040.1	negative
LOC_Os11g17080.1	negative
LOC_Os12g03810.2	negative
LOC_Os12g39630.1	negative
Sb01g001760.1	negative
Sb01g007120.1	negative
Sb01g007270.1	negative
Sb01g009600.1	negative
Sb01g014720.1	negative
Sb01g028760.1	negative
Sb01g030680.1	negative
Sb01g037010.1	negative
Sb01g049350.1	negative
Sb02g001110.1	negative
Sb02g003030.1	negative
Sb02g004030.1	negative
Sb02g004030.2	negative
Sb02g023430.1	negative
Sb02g027630.1	negative
Sb02g027630.2	negative
Sb02g034640.1	positive
Sb02g034640.2	positive
Sb02g039410.2	negative
Sb02g039640.1	negative
Sb02g043510.1	negative
Sb02g044090.1	negative
Sb03g002380.1	negative
Sb03g002790.1	negative
Sb03g003130.1	negative
Sb03g009580.1	negative
Sb03g012070.1	negative
Sb03g012070.2	negative
Sb03g028340.1	positive
Sb03g028740.3	negative
Sb03g029340.1	negative
Sb03g032560.1	negative
Sb03g033530.1	negative
Sb03g036000.1	negative
Sb03g036000.2	negative
Sb03g037570.1	negative
Sb03g037630.1	negative
Sb03g038870.1	positive
Sb03g038890.1	negative
Sb03g039230.1	negative
Sb03g039230.2	negative
Sb04g001920.1	negative
Sb04g002220.1	positive
Sb04g002220.2	positive
Sb04g003480.1	negative
Sb04g008580.1	negative
Sb04g010990.1	negative
Sb04g022410.1	negative
Sb04g023810.1	negative
Sb04g024880.3	negative
Sb04g026150.1	negative
Sb04g029460.1	negative
Sb04g031570.1	negative
Sb04g036670.1	negative
Sb05g002000.1	negative
Sb05g002000.2	negative
Sb05g002000.3	negative
Sb05g004610.1	negative
Sb05g010000.1	negative
Sb05g010000.2	negative
Sb06g016960.1	negative
Sb06g016960.2	negative
Sb06g018760.1	negative
Sb06g026530.1	positive
Sb07g003810.1	negative
Sb07g004750.1	negative
Sb07g027490.1	negative
Sb07g028750.1	negative
Sb08g002240.1	negative
Sb08g004510.1	negative
Sb08g019700.1	negative
Sb08g020960.1	negative
Sb08g020960.2	negative
Sb08g023280.1	negative
Sb08g023280.2	negative
Sb09g002710.1	negative
Sb09g005720.1	negative
Sb09g006270.1	negative
Sb09g021410.1	negative
Sb09g021730.1	negative
Sb09g022960.1	positive
Sb09g024040.1	negative
Sb09g024100.1	positive
Sb09g026450.1	negative
Sb09g027380.1	negative
Sb09g029950.1	positive
Sb10g003810.1	negative
Sb10g026160.1	negative
Sb10g028780.1	negative
Sb10g030040.1	positive
Sb1599s002010.1	negative
